# Supplementary material
Source: PubMed Central journal article supplement (PMC8627461)
Supplement: NIHMS1746293-supplement-Supplementary_Material.pdf [file NIHMS1746293-supplement-Supplementary_Material.pdf]

## Supplementary Tables and Figures

### Clinical performance of methylation as a biomarker for cervical carcinoma-in-situ and cancer diagnosis: a worldwide study

Cristiana Banila<sup>1</sup>, Attila T Lorincz<sup>1</sup>, Dorota Scibior-Bentkowska<sup>1</sup>, Gary M Clifford<sup>2</sup>, Biranhu Kumbi<sup>3</sup>, Dereje Beyene<sup>3</sup>, Cosette M Wheeler<sup>4</sup>, Kate Cuschieri<sup>5</sup>, Jack Cuzick<sup>1</sup>, Belinda Nedjai<sup>1</sup>

#### Table of contents:

1. **Supplementary Table 1** – S5 Classifier sensitivity rates at the predefined 0.80 cut-off in a CIN3 sample group, stratified per hrHPV status, age and country of origin.
2. **Supplementary Table 2** – S5 Classifier sensitivity rates at the predefined 3.70 cut-off in a CIN3 sample group, stratified per hrHPV status, age and country of origin.
3. **Supplementary Table 3** – Sensitivity and specificity of the S5 methylation classifier in identifying CIN3 and invasive cancer based on different classifier cut-offs.
4. **Supplementary Figure 1** – HPV prevalence in the study
5. **Supplementary Figure 2** – S5-classifier score distribution in log scale per country, measured at different endpoints
6. **Supplementary Figure 3** - Distribution of *EPB41L3*, HPV16, HPV18, HPV31L1 and HPV33L2 methylation scores based on the histopathological diagnostic of the patient.

**Supplementary Table 1** – S5 Classifier sensitivity rates at the predefined 0.80 cut-off in a CIN3 sample group, stratified per hrHPV status, age and country of origin.

|                          | n / N*           | S5 sensitivity at cut-off 0.80 |                      | P-value**           |
|--------------------------|------------------|--------------------------------|----------------------|---------------------|
|                          |                  | %                              | 95% CI               |                     |
| <b>HPV***</b>            |                  |                                |                      |                     |
| HPV-positive             | 177 / 194        | 91.23                          | (86.26-94.19)        |                     |
| HPV16                    | 115 / 120        | 95.83                          | (91.44-97.94)        |                     |
| HPV18                    | 7 / 7            | 100.0                          | (88.57-100.0)        | 0.153 <sup>a</sup>  |
| HPV31                    | 25 / 30          | 83.33                          | (79.14-86.54)        | <0.001 <sup>b</sup> |
| HPV33                    | 7 / 7            | 100.0                          | (88.57-100.0)        |                     |
| Other hr-HPV             | 23 / 30          | 76.66                          | (65.02-82.68)        |                     |
| HPV-negative             | 9 / 10           | 90.00                          | (85.62-92.12)        |                     |
| <b>Age</b>               |                  |                                |                      |                     |
| <25                      | 13 / 14          | 92.85                          | (87.97-95.01)        |                     |
| 25-29                    | 55 / 59          | 93.22                          | (88.79-95.92)        |                     |
| 30-39                    | 75 / 81          | 92.59                          | (87.67-94.23)        | 0.365               |
| 40-49                    | 27 / 30          | 90.00                          | (86.69-92.64)        |                     |
| 50-59                    | 13 / 14          | 92.85                          | (87.97-95.01)        |                     |
| >60                      | 5 / 6            | 83.33                          | (77.89-89.92)        |                     |
| <b>Country of Origin</b> |                  |                                |                      |                     |
| Colombia                 | 42 / 50          | 84.00                          | (80.24-87.46)        |                     |
| Spain                    | 46 / 50          | 92.00                          | (88.05-95.62)        | 0.127               |
| United Kingdom           | 53 / 54          | 98.14                          | (96.36-99.13)        |                     |
| USA (New Mexico)         | 45 / 50          | 90.00                          | (85.87-93.75)        |                     |
| <b>Total</b>             | <b>186 / 204</b> | <b>91.18</b>                   | <b>(86.49-94.92)</b> |                     |

\* n = number of positive samples in a specified group; N = group total.

\*\* hrHPV genotype grouping performed by hierarchical genotype attribution, as detailed in materials and methods.

\*\*\* Determined by performing Fishers' exact test of independence.

<sup>a</sup> P-value among all subgroups in the HPV-positive group

<sup>b</sup> P-value between HPV-positive and HPV-negative subgroups

**Supplementary Table 2** – S5 Classifier sensitivity rates at the predefined 3.70 cut-off in a CIN3 sample group, stratified per hrHPV status, age and country of origin.

|                          | S5 sensitivity at cut-off 3.70 |              |                      | P-value**           |
|--------------------------|--------------------------------|--------------|----------------------|---------------------|
|                          | n / N*                         | %            | 95% CI               |                     |
| <b>HPV***</b>            |                                |              |                      |                     |
| HPV-positive             | 116 / 194                      | 59.79        | (46.26-65.95)        |                     |
| HPV16                    | 90 / 120                       | 75.00        | (64.15-82.88)        |                     |
| HPV18                    | 5 / 7                          | 71.42        | (52.55-85.22)        | 0.083 <sup>a</sup>  |
| HPV31                    | 20 / 30                        | 66.66        | (40.56-79.23)        | 0.0094 <sup>b</sup> |
| HPV33                    | 3 / 7                          | 42.85        | (20.65-58.26)        |                     |
| Other hr-HPV             | 10 / 30                        | 33.33        | (15.82-56.34)        |                     |
| HPV-negative             | 2 / 10                         | 20.00        | (5.54-39.12)         |                     |
| <b>Age</b>               |                                |              |                      |                     |
| <25                      | 9 / 14                         | 64.28        | (35.22-75.10)        |                     |
| 25-29                    | 38 / 59                        | 64.40        | (40.54-76.05)        |                     |
| 30-39                    | 45 / 81                        | 55.55        | (41.14-68.67)        | 0.465               |
| 40-49                    | 19 / 30                        | 63.33        | (38.76-78.13)        |                     |
| 50-59                    | 10 / 14                        | 71.42        | (59.67-86.65)        |                     |
| >60                      | 4 / 6                          | 66.66        | (51.79-79.92)        |                     |
| <b>Country of Origin</b> |                                |              |                      |                     |
| Colombia                 | 28 / 50                        | 56.00        | (42.53-68.12)        |                     |
| Spain                    | 30 / 50                        | 60.00        | (44.15-72.35)        | 0.227               |
| United Kingdom           | 41 / 54                        | 75.92        | (62.15-82.12)        |                     |
| USA (New Mexico)         | 28 / 50                        | 56.00        | (42.53-68.12)        |                     |
| <b>Total</b>             | <b>128 / 204</b>               | <b>62.74</b> | <b>(55.22-72.10)</b> |                     |

**Supplementary Table 3 – Sensitivity and specificity of the S5 methylation classifier in identifying CIN3 and invasive cancer based on different classifier cut-offs.** 0.80 is the pre-defined cut-off developed in the UK and validated for developed countries, 2.62 is the Youden-J index cut-offs based on the methylation scores of invasive cervical cancers and 3.70 as cut-off explored in Mexico and proposed for underdeveloped countries.

|                         |                | <b>AUC</b>  | <b>95% CI</b> | <b>Cut-off</b> | <b>Sensitivity (%)</b> | <b>95% CI</b> | <b>McNemar p-value*</b> | <b>Specificity (%)</b> | <b>95% CI</b> | <b>McNemar p-value*</b> | <b>Women missed N (% total)</b> |            |
|-------------------------|----------------|-------------|---------------|----------------|------------------------|---------------|-------------------------|------------------------|---------------|-------------------------|---------------------------------|------------|
| <b>HPV(-)/Cyt(-) vs</b> | CIN3 (n=204)   | <b>0.90</b> | 0.87<br>0.93  | -              | 0.80                   | 91.18         | 86.48 - 94.16           |                        | 65.12         | 54.59 – 74.35           |                                 | 16 (8.22)  |
|                         |                |             |               |                | 2.62                   | 68.13         | 61.46 – 74.15           | <0.0001                | 100           | 95.19 - 100             | <0.0001                         | 65 (31.87) |
|                         |                |             |               |                | 3.70                   | 62.74         | 55.93 – 69.09           | <0.0001                | 100           | 95.72 - 100             | <0.0001                         | 76 (37.26) |
|                         | Cancer (n=544) | <b>0.99</b> | 0.98<br>0.99  | -              | 0.80                   | 99.81         | 98.56 – 99.99           |                        | 65.12         | 54.59 – 74.35           |                                 | 2 (0.36)   |
|                         |                |             |               |                | 2.62                   | 95.21         | 93.12 – 96.68           | 0.036                  | 100           | 95.19 – 100             | 0.0025                          | 27 (4.88)  |
|                         |                |             |               |                | 3.70                   | 93.26         | 90.89– 95.05            | 0.002                  | 100           | 95.72 - 100             | <0.0001                         | 38 (6.74)  |
| <b>HPV(+)/Cyt(-) vs</b> | CIN3 (n=204)   | <b>0.80</b> | 0.76<br>0.84  | -              | 0.80                   | 91.18         | 86.48 - 94.16           |                        | 48.81         | 41.36 - 56.31           |                                 | 16 (8.22)  |
|                         |                |             |               |                | 2.62                   | 68.13         | 61.46 – 74.15           | <0.0001                | 78.57         | 71.76 – 84.10           | <0.0001                         | 65 (31.87) |
|                         |                |             |               |                | 3.70                   | 62.74         | 55.93 – 69.09           | <0.0001                | 83.33         | 76.97 – 88.21           | <0.0001                         | 76 (37.26) |
|                         | Cancer (n=544) | <b>0.97</b> | 0.96<br>0.98  | -              | 0.80                   | 99.81         | 98.56 – 99.99           |                        | 50.60         | 43.11 – 58.06           |                                 | 2 (0.36)   |
|                         |                |             |               |                | 2.62                   | 95.21         | 93.12 – 96.68           | 0.036                  | 78.57         | 71.76 – 84.10           | 0.0051                          | 27 (4.79)  |
|                         |                |             |               |                | 3.70                   | 93.26         | 90.89– 95.05            | 0.002                  | 83.33         | 76.97 – 88.21           | <0.0001                         | 38 (6.74)  |

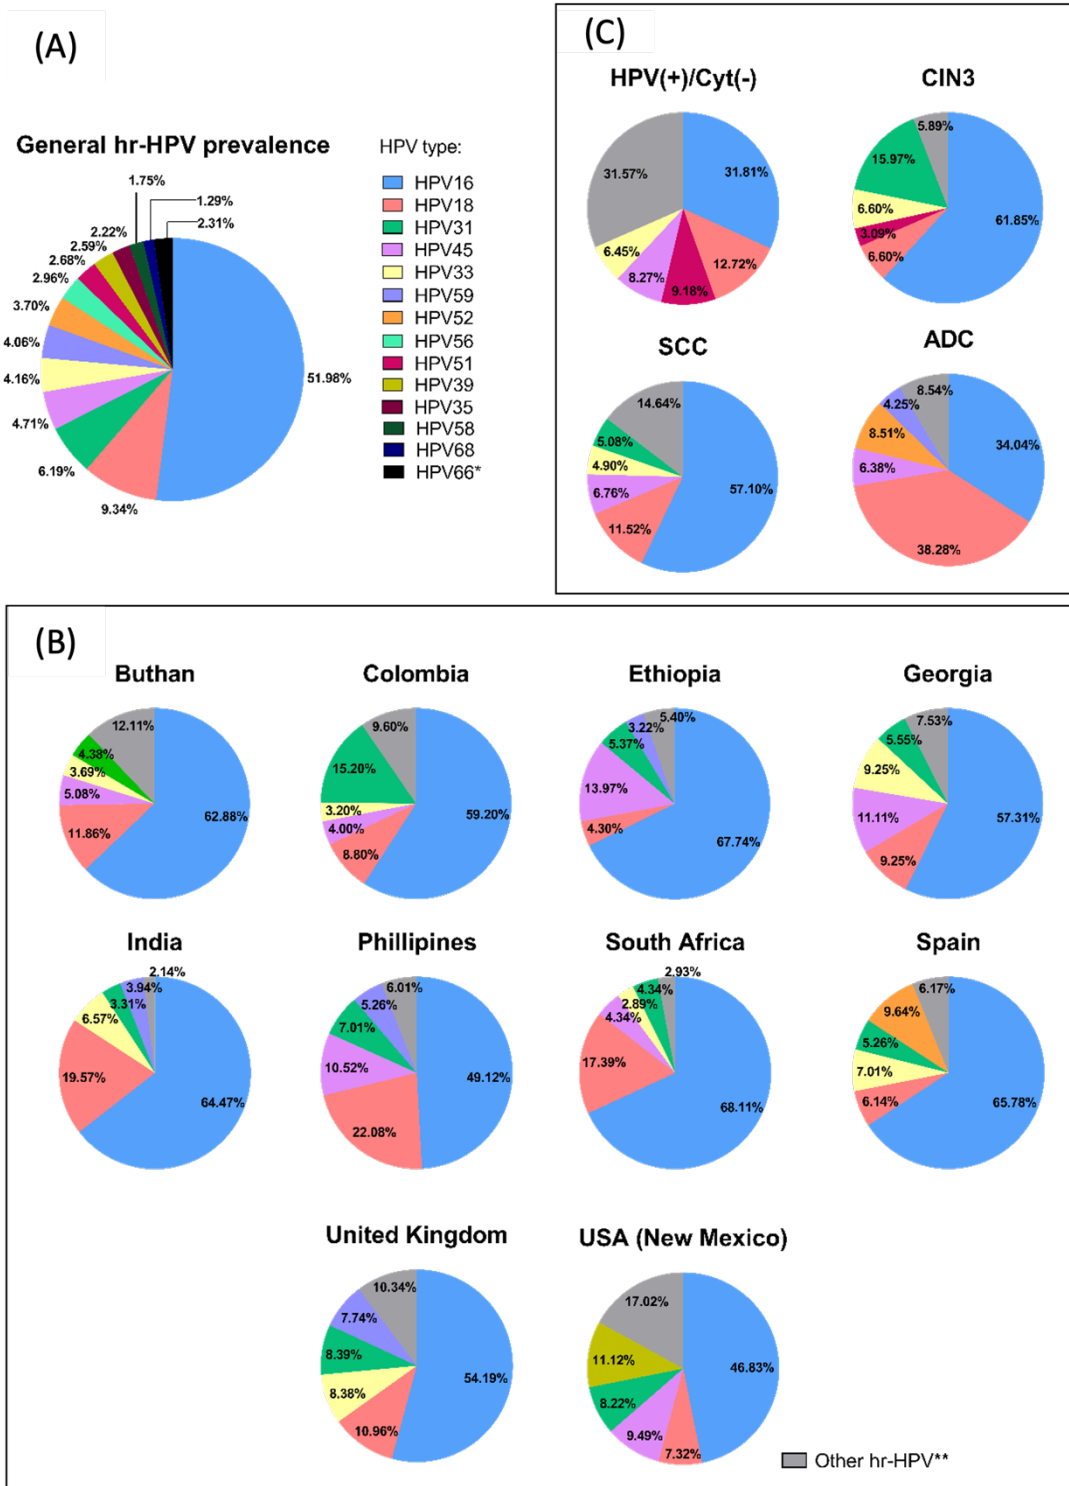

**Supplementary Figure 1 – HPV prevalence in the study.** (A) general hr-HPV prevalence (B) stratified prevalence per country of origin and (C) histology diagnosis of women in the study. Each analysed group and subgroup investigate HPV positive (all 13 types of hr-HPV and HPV66\* now regarded as low-risk) only women. (B) and (C) show the percentages of the 5 most prevalent hr-HPV type in women per subgroup, any other hrHPV types different than the top 5 were marked as Other hr-HPV (\*\*). Only the most abundant cervical cancer subgroups were considered: squamous cell carcinoma (SCC, n=510) and adenocarcinoma (ADC, n=29). The adenosquamous cell carcinomas (n = 1) and neuroendocrine small cell carcinoma (n = 4) were deliberately not included. Abbreviations: HPV(+)/Cyt(-), HPV positive with cytology negative results; CIN, cervical intraepithelial neoplasia (of grade 3); SCC, squamous cell carcinoma; ADC, adenocarcinoma.

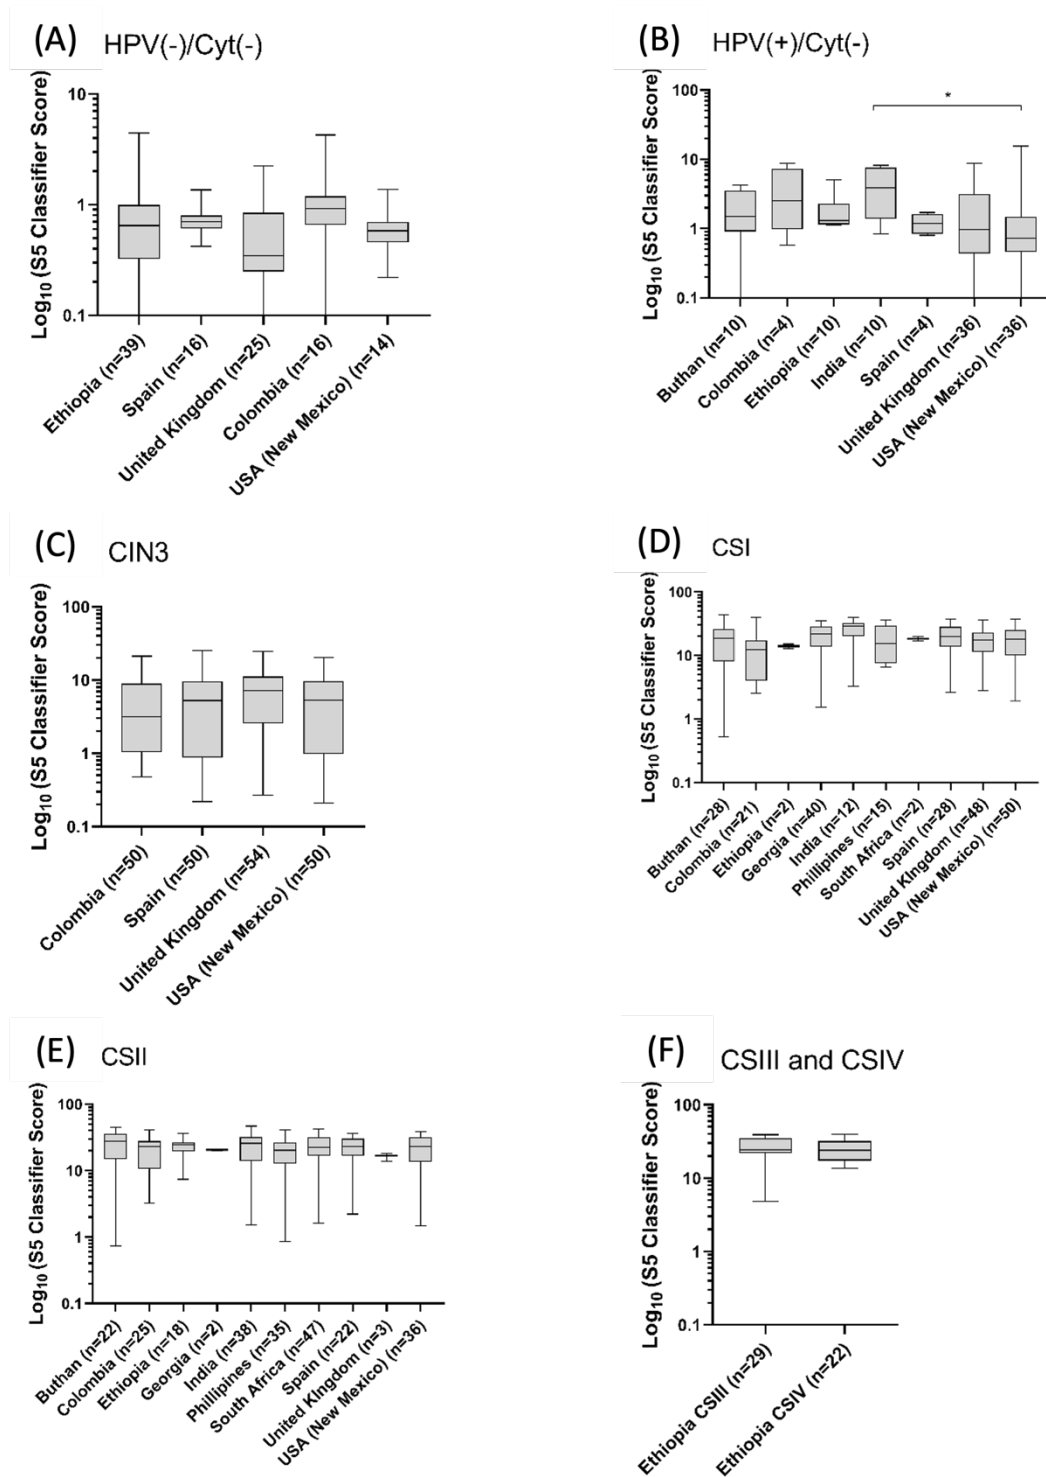

**Supplementary Figure 2** – S5-classifier score distribution in log scale per country, measured at different endpoints: **(A)** (HPV(-)/Cyt(-), **(B)** HPV(+)/Cyt(-), **(C)** CIN3, **(D)** CSI, **(E)** CSII, **(F)** CSIII and CSIV. Data is shown as box plots. Significant differences between countries are marked on top of the graph with “\*” for  $p < 0.01$  and “\*\*\*” for  $p < 0.001$ . Abbreviations: HPV(-/+)/Cyt(-), HPV positive/negative and cytology negative; CIN, cervical intraepithelial neoplasia (of grade 3); CSI-IV, cervical cancer stages I-IV.

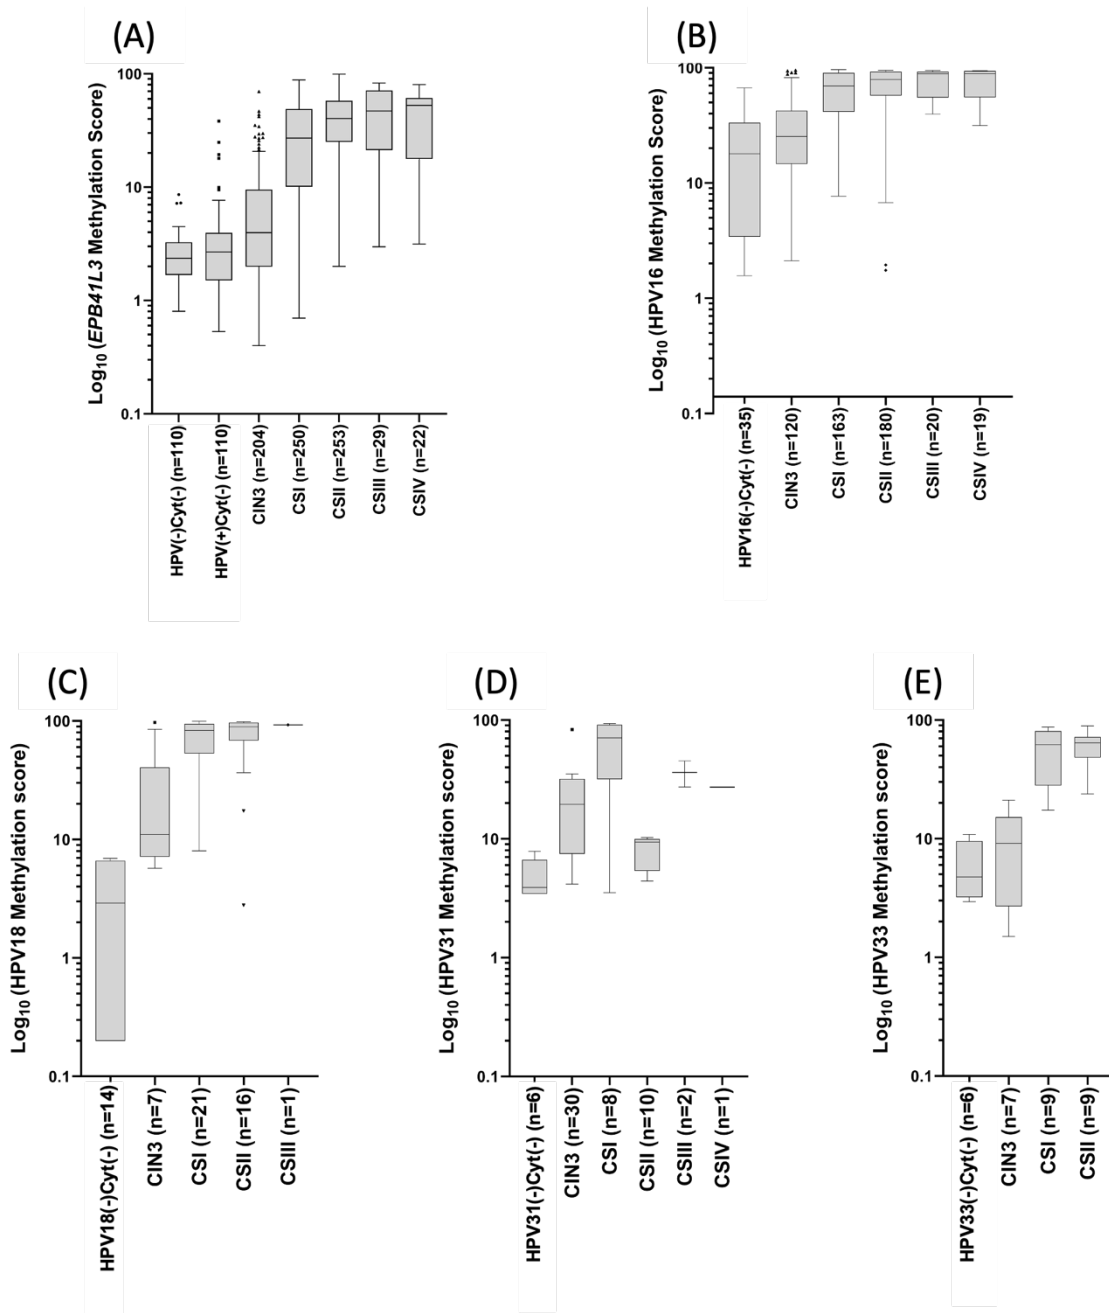

**Supplementary Figure 3 - Distribution of *EPB41L3*, HPV16, HPV18, HPV31L1 and HPV33L2 methylation scores based on the histopathological diagnostic of the patient.** Absolute methylation was calculated as an average of the selected CpGs on: *EPB41L3* (A), HPV16 L1 and L2 late genes (B) HPV18 L2 (C), HPV31 L1 (D) and HPV33 L2 (E) and plotted as log10 of methylation score. Significant differences were found between the following group comparisons in HPV(-)/Cyt(-) vs CIN3 ( $p = 0.049$ ), HPV(-)/Cyt(-) vs CSI-IV (all,  $p < 0.0001$ ), HPV(+)/Cyt(-) vs CSI-IV (all,  $p < 0.0001$ ), CIN3 vs CSI-IV (all,  $p < 0.0001$ ) and CSI vs CSII ( $p < 0.0001$ ); in HPV16(+)/Cyt(-) vs CSI-IV (all,  $p < 0.0001$ ) and CIN3 vs CSI-IV (all,  $p < 0.0001$ ). HPV18(+)/Cyt(-) vs CSI ( $p = 0.013$ ), HPV18(+)/Cyt(-) vs CIN3 ( $p = 0.023$ ), HPV18(+)/Cyt(-) vs CSII ( $p = 0.003$ ), CIN3 vs CSII ( $p = 0.010$ ); in HPV31(+)/Cyt(-) vs CSI ( $p < 0.001$ ); in HPV33(+)/Cyt(-) vs CSI ( $p = 0.025$ ), HPV33(+)/Cyt(-) vs CSII ( $p = 0.007$ ), CIN3 vs CSI ( $p = 0.007$ ), CIN3 vs CSII ( $p < 0.001$ ). Other comparisons were not significant.
